# Supplementary material for: Proteome Analysis of Dormancy-Released Seeds of Fraxinus mandshurica Rupr. in Response to Re-Dehydration under Different Conditions
Source: Int J Mol Sci. 2015 Mar 2;16(3):4713–30. doi: 10.3390/ijms16034713 (PMC4394444; doi:10.3390/ijms16034713)
Supplement: Supplementary file 1 [file ijms-16-04713-s001.xls]

## Sheet: Table S1
Table S1. Data for identified seven protein spots.
Spot no.	Protein name	Species	Accession No	Protein MW	Protein PI	Protein Score C. I. %	Change Ratio
							Cold/Control	Control + desiccation / Control	Cold + calciumpre treatment / Cold	Cold + calciumpre treatment/ Control + desiccation	Cold + calciumpre treatment / Control	Cold / Control + desiccation
226	Putative acyl-coenzyme A oxidase 3.2,peroxisomal	Arabidopsis thaliana	sp|Q9LMI7|ACO32_ARATH	76479	7.93	86.829	-	-	-	-1.54	-	-
756	Catalase isozyme 3	Nicotiana plumbaginifolia	sp|P49317|CATA3_NICPL	57493.5	6.78	100	-	-	-	-1.91	-1.78	-
780	Catalase isozyme 1	Ricinus communis	sp|Q01297|CATA1_RICCO	56941.5	7.08	100	-	-	-	-1.66	-1.81	-
781	Catalase isozyme 3	Nicotiana plumbaginifolia	sp|P49317|CATA3_NICPL	57493.5	6.78	100	-	-	-	-1.95	-2.1	-
782	Catalase isozyme 3	Nicotiana plumbaginifolia	sp|P49317|CATA3_NICPL	57493.5	6.78	100	-	-	-	-1.77	-1.66	-
1601	Kinesin-1	Arabidopsis thaliana	sp|Q07970|ATK1_ARATH	89676.6	6.8	89.294	1.59	-	-	-	-	-
2919	Nucleoside diphosphate kinase	Capsicum annuum	sp|Q9M7P6|NDK_CAPA	16372.5	6.31	99.488	-	-	-	-2.16	-2.19	-

## Sheet: Table S2
Table S2. Data for identified whole protein spots.
Spot no.	Protein name	Species	Accession No	Protein MW	Protein PI	Protein Score C. I. %	Change Ratio
							Cold/Control	Control + desiccation / Control	Cold + calciumpre treatment / Cold	Cold + calciumpre treatment/ Control + desiccation	Cold + calciumpre treatment / Control	Cold / Control + desiccation
65	-	-	-	-	-	-	-	-	1.5	-	-	-
223	-	-	-	-	-	-	-	-	-	-1.52	-	-
225	-	-	-	-	-	-	-	-	-	-1.67	-	-
226	Putative acyl-coenzyme A oxidase 3.2,peroxisomal	Arabidopsis thaliana	sp|Q9LMI7|ACO32_ARATH	76479	7.93	86.829	-	-	-	-1.54	-	-
352	-	-	-	-	-	-	-	-	2.04	-	-	1.64
425	-	-	-	-	-	-	-	-	-	-	1.52	-
477	-	-	-	-	-	-	-	-	-	-1.63	-	-
532	-	-	-	-	-	-	-	-	-	-1.57	-1.51	-
580	-	-	-	-	-	-	-	-	-	-1.7	-	-
756	Catalase isozyme 3	Nicotiana plumbaginifolia	sp|P49317|CATA3_NICPL	57493.5	6.78	100	-	-	-	-1.91	-1.78	-
780	Catalase isozyme 1	Ricinus communis	sp|Q01297|CATA1_RICCO	56941.5	7.08	100	-	-	-	-1.66	-1.81	-
781	Catalase isozyme 3	Nicotiana plumbaginifolia	sp|P49317|CATA3_NICPL	57493.5	6.78	100	-	-	-	-1.95	-2.1	-
782	Catalase isozyme 3	Nicotiana plumbaginifolia	sp|P49317|CATA3_NICPL	57493.5	6.78	100	-	-	-	-1.77	-1.66	-
814	-	-	-	-	-	-	-1.73	-	-			-
905	-	-	-	-	-	-	-	-	-	-1.58	-	-
1358	-	-	-	-	-	-	2.07	-	-	-1.78	2.18	-
1601	Kinesin-1	Arabidopsis thaliana	sp|Q07970|ATK1_ARATH	89676.6	6.8	89.294	1.59	-	-	-	-	-
1764	-	-	-	-	-	-	-	-	-	1.68	-	1.65
2207	-	-	-	-	-	-	1.68	-	-	-	-	-
2526	-	-	-	-	-	-	-	-	1.57	-	-	-
2542	-	-	-	-	-	-	-	-	-1.55	-	-	-
2560	-	-	-	-	-	-	-	-	-1.74	-2.25	-	-
2585	-	-	-	-	-	-	-	-	-	1.71	-	-
2723	-	-	-	-	-	-	-	-	-	-2.49	-2.18	-
2728	-	-	-	-	-	-	-	-	-	-1.56	-	-
2848	-	-	-	-	-	-	-	-	-	1.9	1.98	-
2919	Nucleoside diphosphate kinase	Capsicum annuum	sp|Q9M7P6|NDK_CAPA	16372.5	6.31	99.488	-	-	-	-2.16	-2.19	-
